# Supplementary material for: A broadband optical pH sensor using upconversion luminescence
Source: Royal Society of Chemistry journal article supplement (doi:10.1039/d1tc00792k), 2021-01-01
Supplement: d1tc00792k1.pdf [file d1tc00792k1.pdf]

## A broadband optical pH sensor using upconversion luminescence

Suresh K,<sup>[a]</sup> Aseefhali Bankapur,<sup>[a, b]</sup> Santhosh Chidangil,<sup>[a, b]</sup> Harishkumar Madhyastha,<sup>[c]</sup> Sakai Kentaro,<sup>[d]</sup> Sajjan D. George\*<sup>[a, e]</sup>

<sup>a</sup> Department of Atomic and Molecular Physics, Manipal Academy of Higher Education, Manipal, 576104, India

<sup>b</sup> Centre of Excellence for Biophotonics, Manipal Academy of Higher Education, Manipal, 576104, India

<sup>c</sup> Department of Applied Physiology, School of Medicine, University of Miyazaki, Miyazaki, 8891692, Japan

<sup>d</sup> Frontier Science division, Center for Collaborative Research, University of Miyazaki, Miyazaki, 8892153, Japan

<sup>e</sup> Centre for applied Nanosciences (CANs), Manipal Academy of Higher Education, Manipal, 576104, India.

\*E-mail: Sajjan.george@manipal.edu

### Supplementary Information

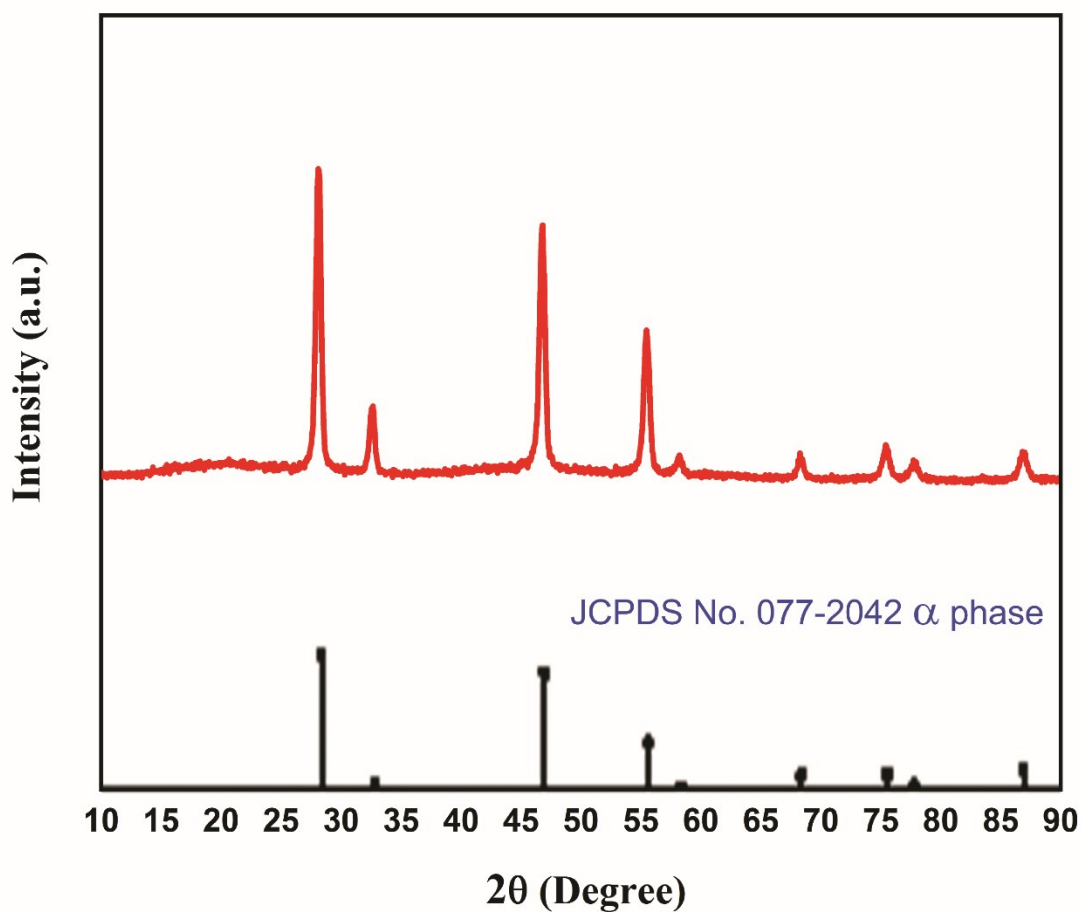

Figure S1: XRD spectra of PEI capped upconversion particles

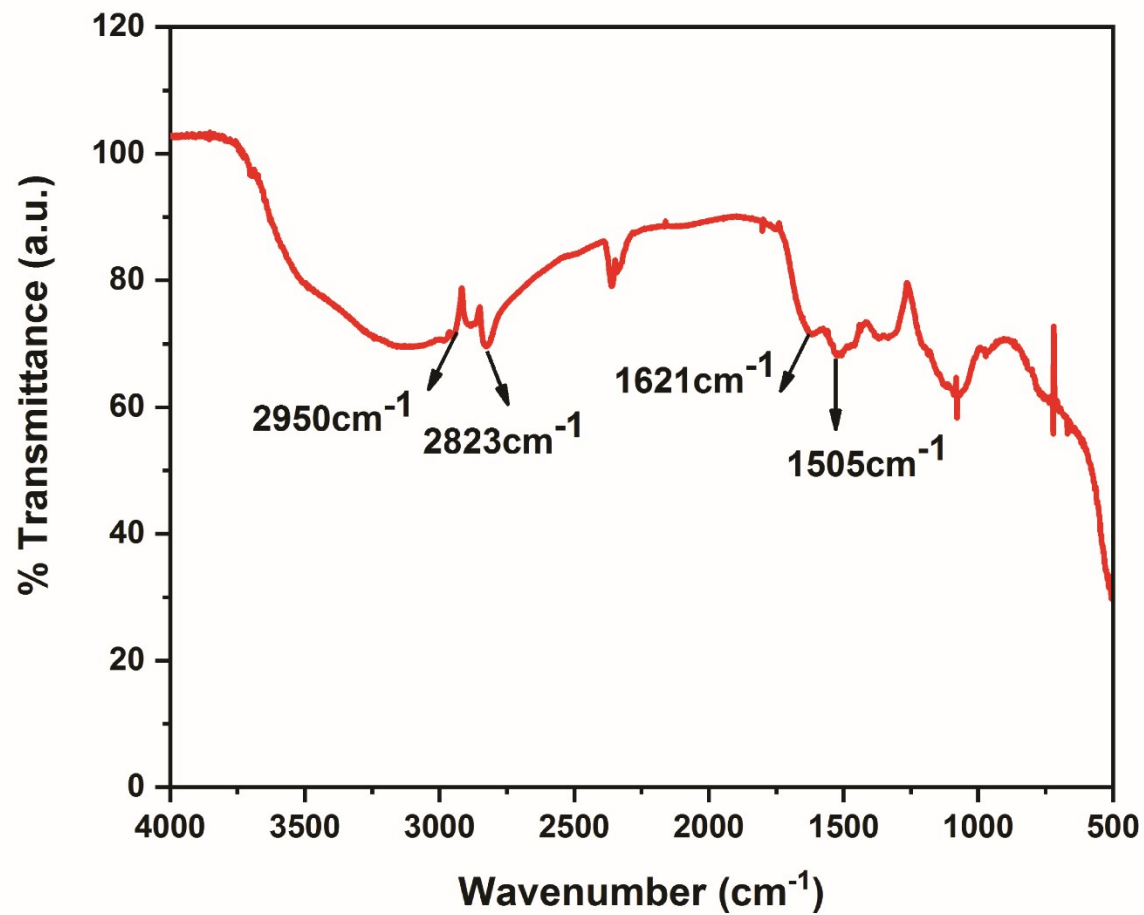

Figure S2: FT-IR spectra of PEI capped upconversion particles

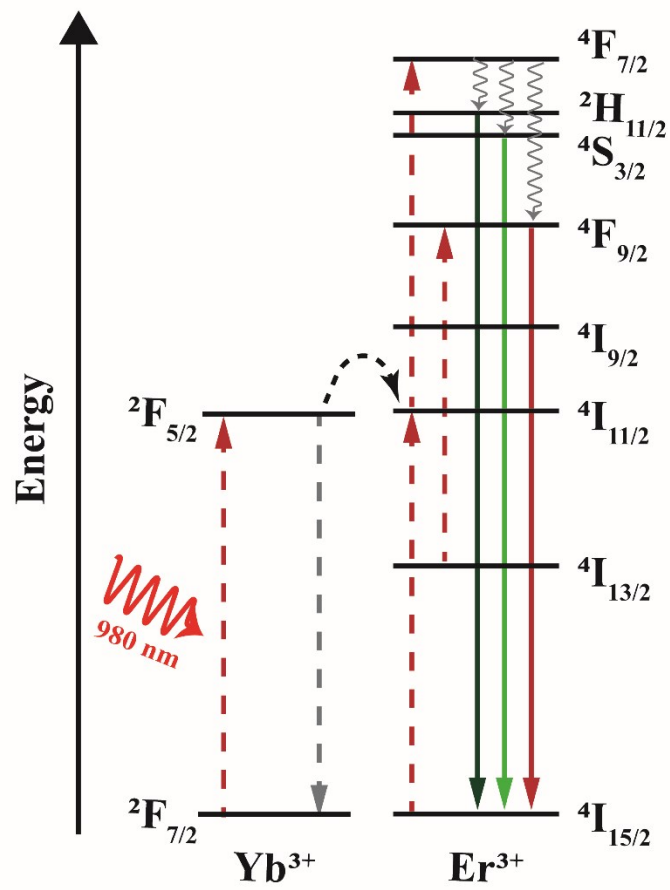

**Figure S3:** Energy level diagram of  $\text{Yb}^{3+}/\text{Er}^{3+}$  ions

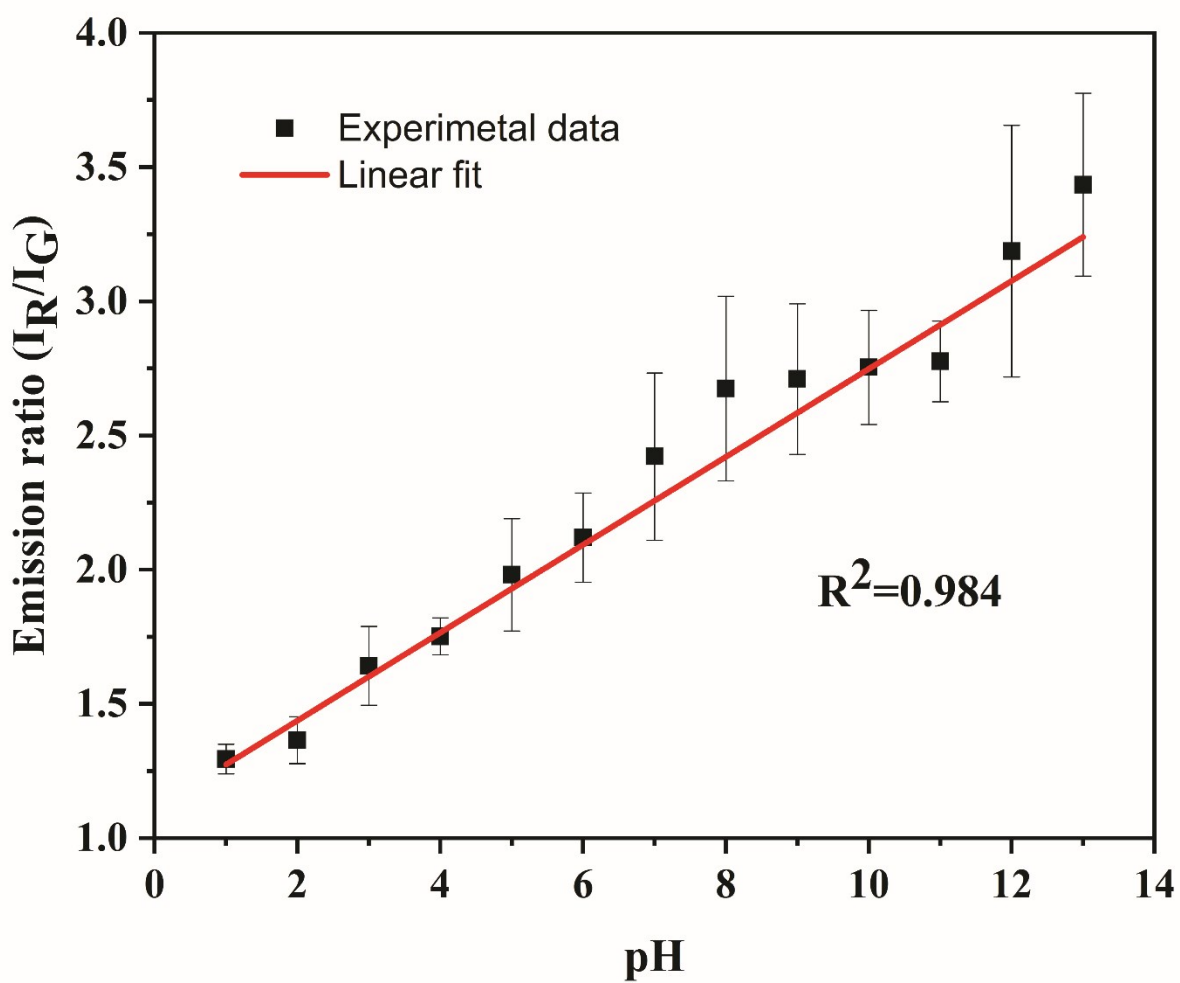

**Figure S4:** Red/Green emission ratio of the trapped particle in the chamber at different pH

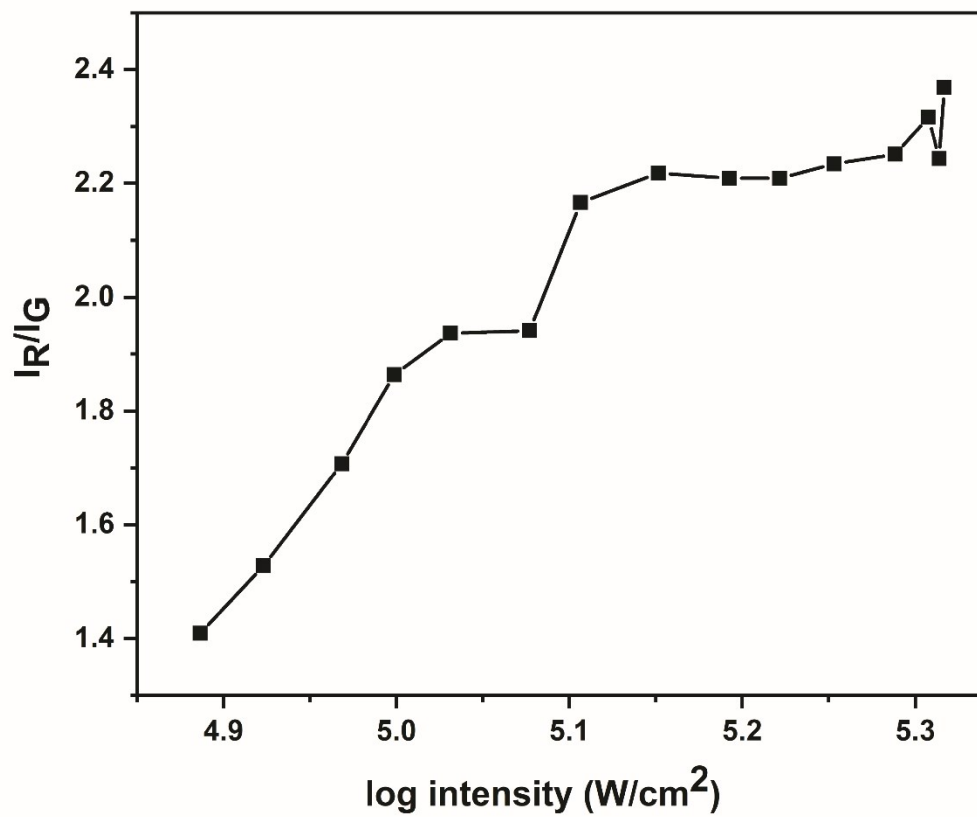

**Figure S5:** Red/Green emission ratio of the trapped particle at different excitation intensities

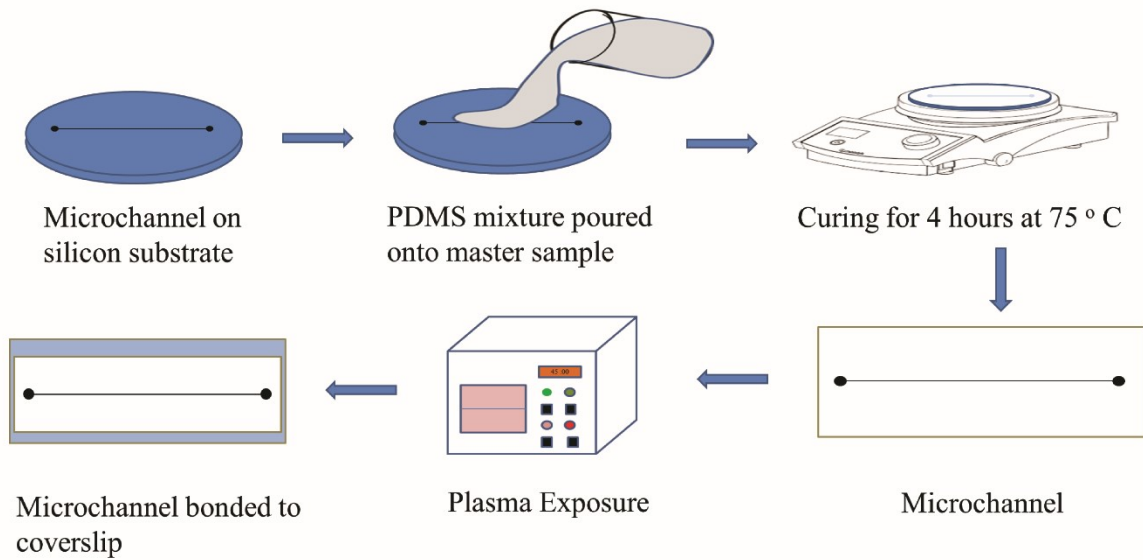

**Figure S6:** Microfluidic channel fabrication method

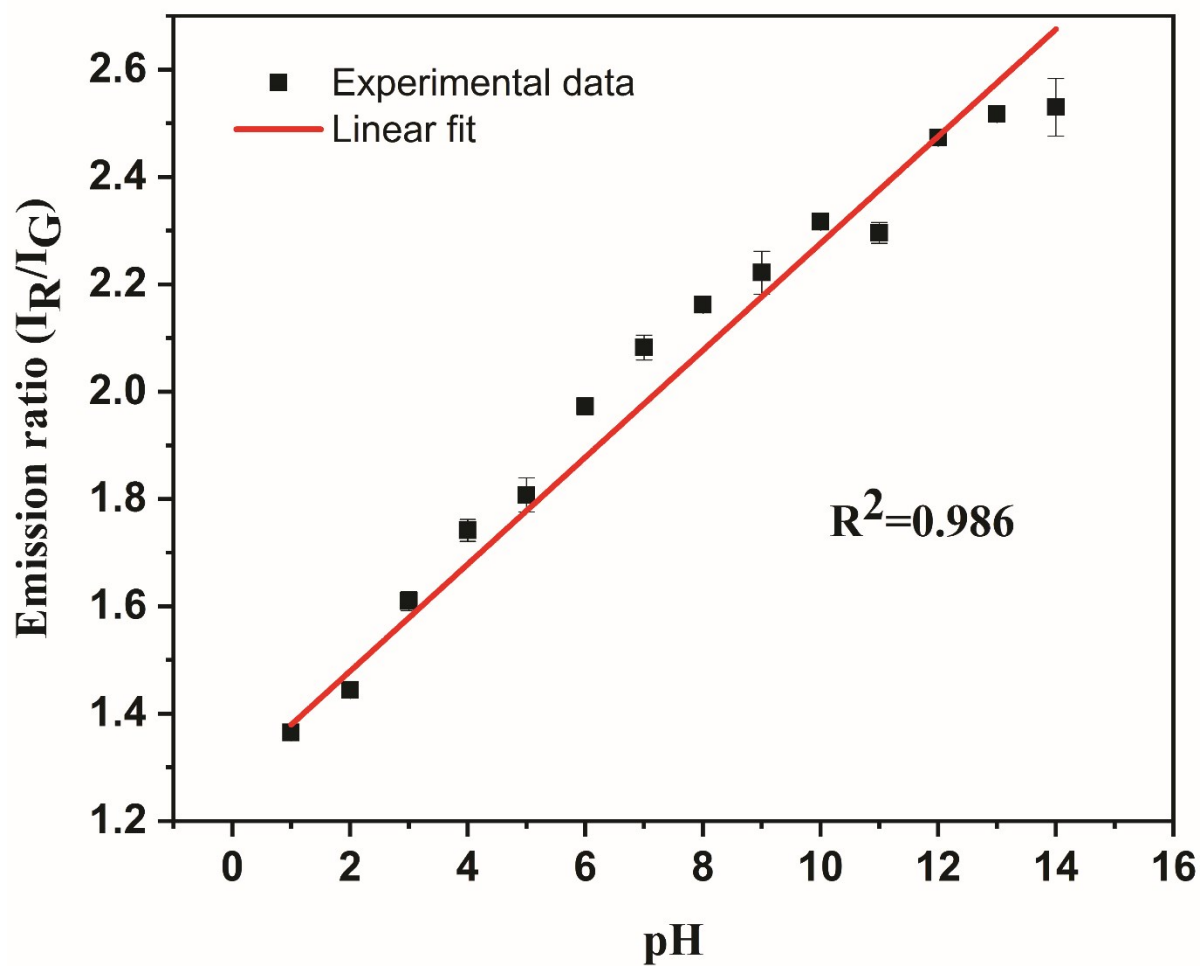

**Figure S7:** Red/Green emission ratio of the sample trapped in the microfluidic channel at different pH

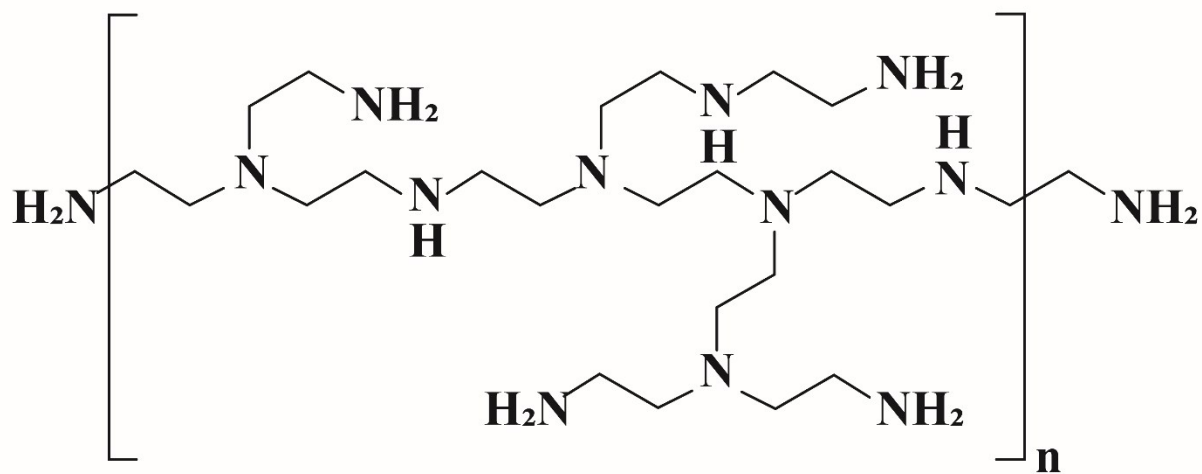

**Figure S8:** Structure of branched polyethylenimine (PEI)



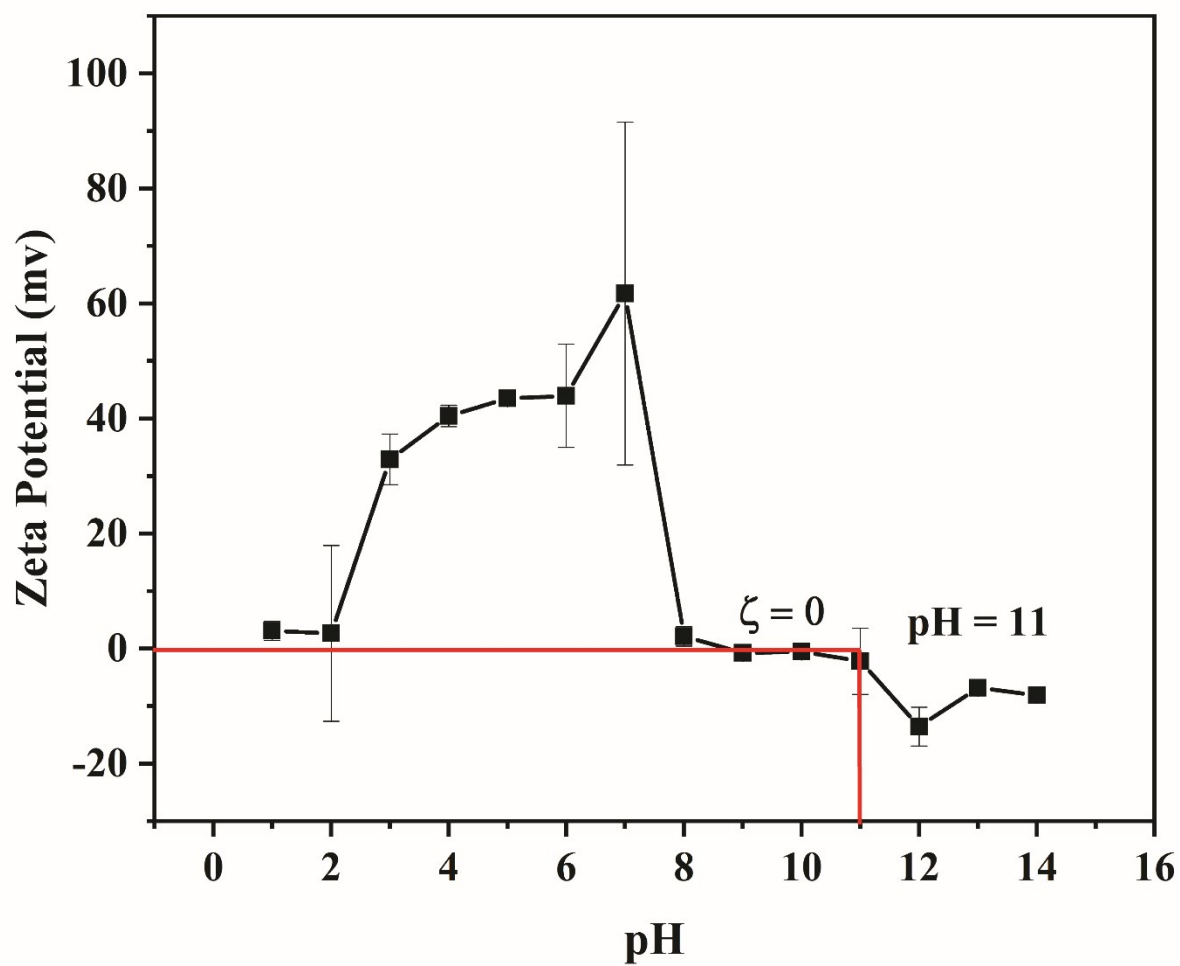

**Figure S9:** Zeta potential value of NaYF<sub>4</sub>: Yb, Er at different pH

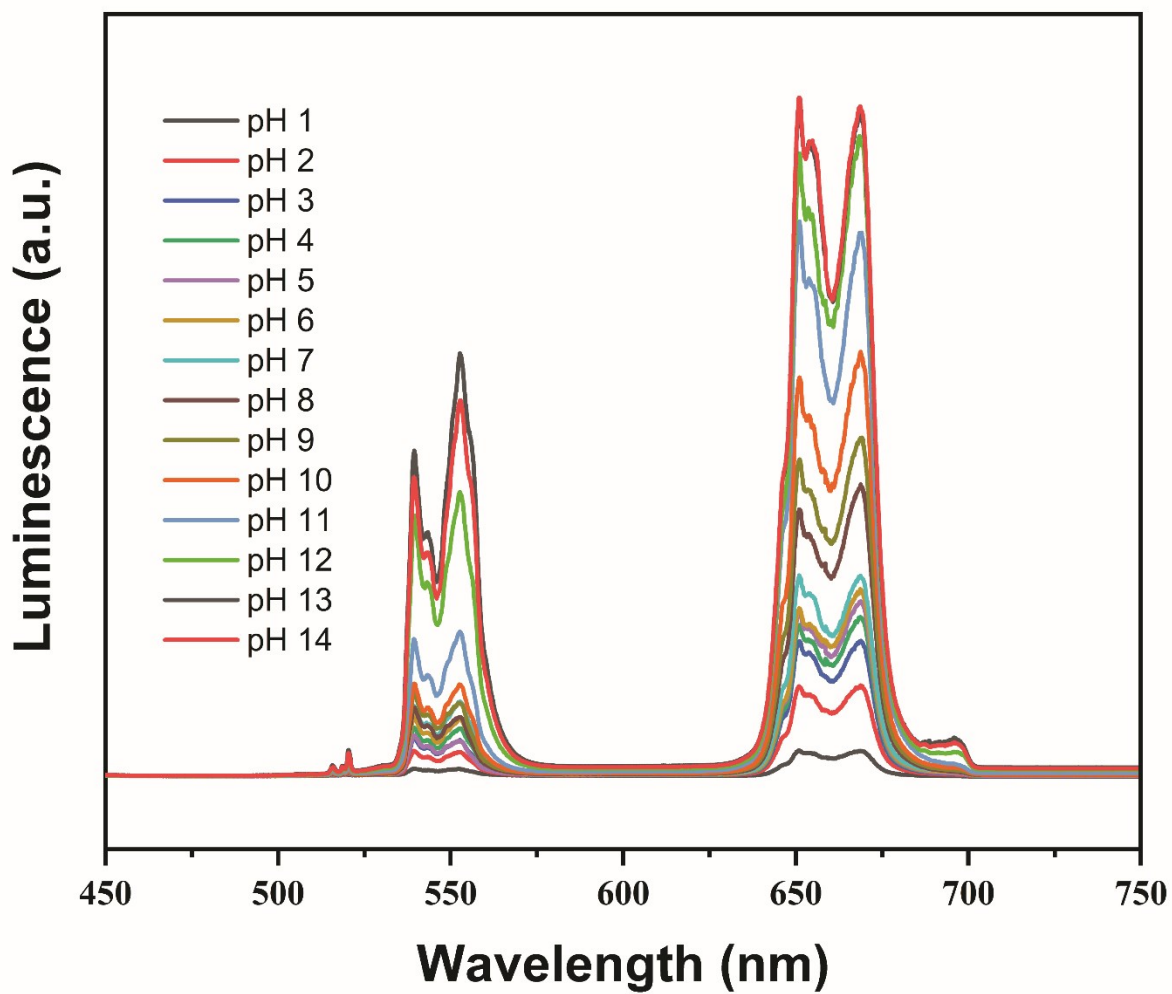

**Figure S10:** Upconversion luminescence spectrum of without trapping NaYF<sub>4</sub>: Yb,Er particle at different pH

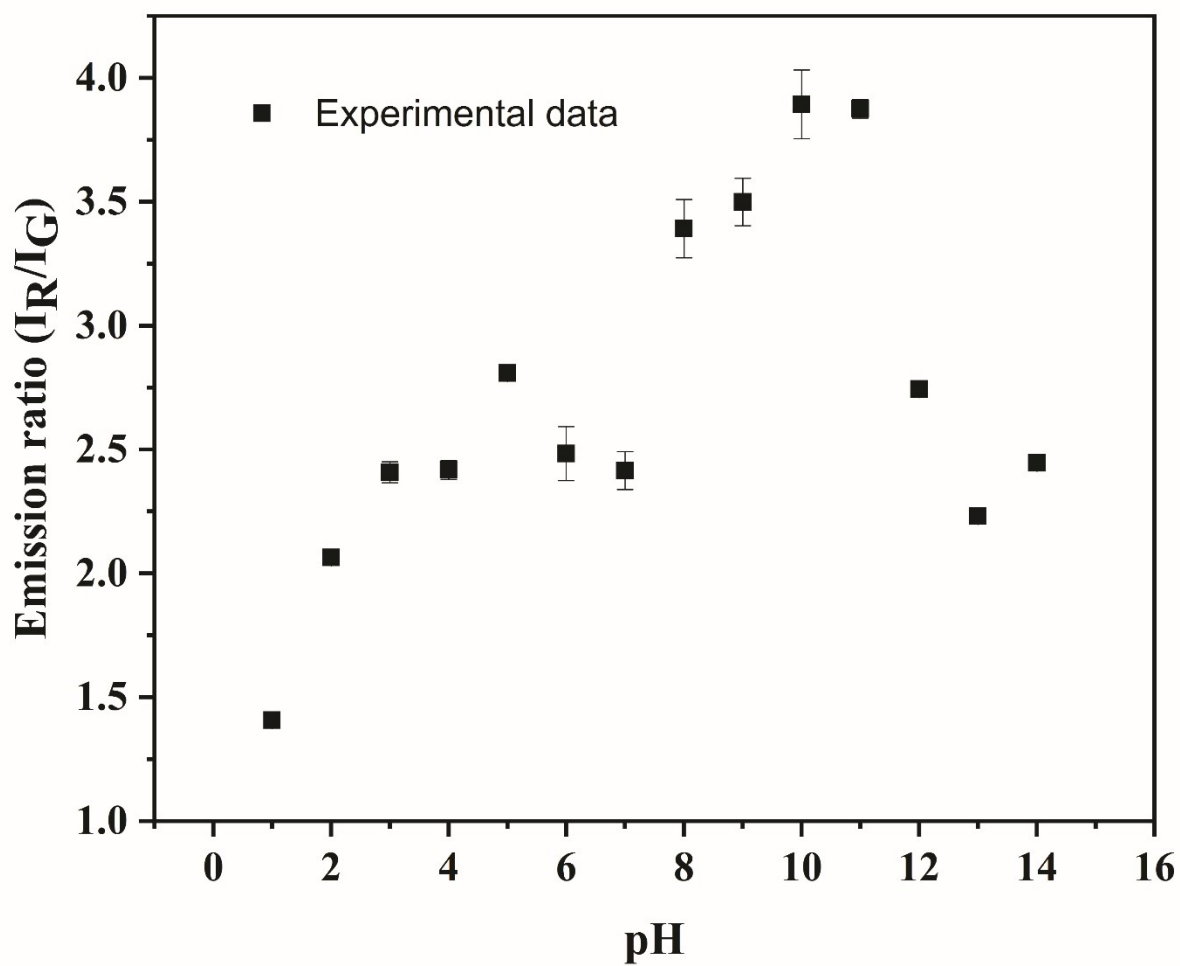

**Figure S11:** Red/Green emission ratio of the sample without trapped in the chamber at different pH
